# Supplementary material
Source: publisher figshare collection journal article supplement (https://karger.figshare.com/ndownloader/files/30806773)
Supplement: Supplementary file 1 [file 30806773]

**Supplementary Table 7. Sex differences in years of education, cardiovascular disease and functional capacity**

|  | Men  (N=673) | Women  (N=709) | Overall  (N=1382) | P-value |
| --- | --- | --- | --- | --- |
|  |  |  |  |  |
| Years of education | median 14.5  IQR 12 - 18  (N=503) | median 13  IQR 11.5 - 16  (N=544) | median 13.5  IQR 11.5 – 18  (N=1047) | <0.001* |
| Cardiovascular disease,  including:  Myocardial infarction  Heart failure  Coronary artery disease  Peripheral artery disease  Hypertension | 59.3%  (N=666)  - 2.9% (N=661)  - 14.8% (N=660)  - 6.0% (N=663)  - 1.1% (N=666)  - 50.2% (N=662) | 58.7%  (N=702)  - 1.4% (N=693)  - 26.0% (N=697)  - 3.0% (N=701)  - 0.4% (N=695)  - 46.0% (N=698) | 59.0%  (N=1368)  - 2.1% (N=1354)  - 20.6% (N=1357)  - 4.5% (N=1364)  - 0.7% (N=1361)  - 48.0% (N=1360) | 0.816 |
| Fried Frailty Score | 31.8% pre frail/frail  (N=623) | 33.8% pre frail/frail  (N=628) | 32.8% pre frail/frail  (N=1251) | 0.457 |
| Mini Nutritional Assessment (MNA) | median 28  IQR 26.5 – 29  (N=646) | median 27.5  IQR 26.5 – 28.5  (N=687) | median 27.5  IQR 26.5 - 28.5  (N=1333) | 0.016* |
| Falls in the past 12 months | 27.8%  (N=654) | 34.3%  (N=662) | 31.1%  (N=1316) | 0.011* |
| CES-D Scale  Score ≥16, depressive episode possible | 8.5%  (N=659) | 14.3%  (N=684) | 11.5%  (N=1343) | 0.001* |
|  |  |  |  |  |

Notes and abbreviations; Sex differences in years of education, cardiovascular diseases and parameters of functional capacity.

CES-D Scale, Center for Epidemiologic Studies Depression Scale; IQR, interquartile range
